# Supplementary material for: Estimating a population cumulative incidence under calendar time trends
Source: PubMed Central journal article supplement (PMC5225659; doi:10.1186/s12874-016-0280-6), 2017-01-11
Supplement: 12874_2016_280_MOESM1_ESM.pdf [file 12874_2016_280_MOESM1_ESM.pdf]

# Estimating a population cumulative incidence under calendar time trends

Stefan N. Hansen<sup>\*1</sup>, Morten Overgaard<sup>1</sup>, Per K. Andersen<sup>2</sup>, and Erik T. Parner<sup>1</sup>

<sup>1</sup>*Section for Biostatistics, Aarhus University*

<sup>2</sup>*Section of Biostatistics, University of Copenhagen*

BMC Medical Research Methodology

## Additional file 1

### The variance of the Kaplan–Meier estimator of the event risk within the study period

We derive the weighted average of the stratum-wise Kaplan–Meier estimators as a non-parametric maximum likelihood estimator and its asymptotic variance when the  $\pi_i$ 's are considered unknown.

Suppose we have a sample consisting of  $n_i$  observations from the  $i$ th stratum with  $n = \sum_i n_i$  being the total sample size. Due to right-censoring we observe  $t_{ij} = \tilde{t}_{ij} \wedge c_{ij}$ , where  $\tilde{t}_{ij}$  is the actual time-to-event and  $c_{ij}$  is the censoring time, and  $\delta_{ij} = \mathbf{1}_{\tilde{t}_{ij} \leq c_{ij}}$  for  $i = 1, \dots, k$  and  $j = 1, \dots, n_i$  with observations being independent. Under independent right-censoring the likelihood is

$$\begin{aligned} L(\pi_1, \dots, \pi_k, S_1, \dots, S_k) &= \prod_{i=1}^k \prod_{j=1}^{n_i} \pi_i f_i(t_{ij})^{\delta_{ij}} S_i(t_{ij})^{1-\delta_{ij}} \\ &= \prod_{i=1}^k \pi_i^{n_i} \prod_{j=1}^{n_i} f_i(t_{ij})^{\delta_{ij}} S_i(t_{ij})^{1-\delta_{ij}} \end{aligned}$$

with  $(S_1, \dots, S_k)$  and  $(f_1, \dots, f_k)$  being the conditional survival functions and conditional densities in the  $k$  strata respectively and  $(\pi_1, \dots, \pi_k)$  being the probabilities of belonging to the strata. The corresponding non-parametric likelihood function [2] is thus

$$\tilde{L}(\pi_1, \dots, \pi_k, S_1, \dots, S_k) = \prod_{i=1}^k \pi_i^{n_i} \prod_{j=1}^{n_i} \Delta S_i(t_{ij})^{\delta_{ij}} S_i(t_{ij})^{1-\delta_{ij}}$$

with  $\Delta S_i(t_{ij}) = S_i(t_{ij-}) - S_i(t_{ij})$  being the jump at  $t_{ij}$ . Maximizing this non-parametric likelihood function yields the estimates  $\hat{\pi}_i = n_i/n$  which is the observed proportion and  $\hat{S}_i = (\hat{S}_i(t))_{t \geq 0}$ , the Kaplan–Meier estimator in the  $i$ th stratum, for  $i = 1, \dots, k$ .

Let  $S_w(t_1) = P(T \leq U)$  with  $U = \sum_{i=1}^k t_i \mathbf{1}_{B=i}$  and let

$$\hat{S}_w(t_1) = \sum_{i=1}^k \frac{n_i}{n} \hat{S}_i(t_i)$$

denote the Kaplan–Meier estimator of the within-study event risk. If  $\hat{\boldsymbol{\pi}} = (\hat{\pi}_1, \dots, \hat{\pi}_k)^\top$  is the vector of observed proportions and  $\hat{\mathbf{S}} = (\hat{S}_1(t_1), \dots, \hat{S}_k(t_k))^\top$  is the vector of Kaplan–Meier estimates evaluated at the end of follow-up times  $t_1, \dots, t_k$ , then by properties of the non-parametric maximum likelihood estimates we have

$$\sqrt{n} \left( \begin{pmatrix} \hat{\boldsymbol{\pi}} \\ \hat{\mathbf{S}} \end{pmatrix} - \begin{pmatrix} \boldsymbol{\pi} \\ \mathbf{S} \end{pmatrix} \right) \xrightarrow{\mathcal{D}} \mathcal{N}_{2k}(\mathbf{0}, \begin{pmatrix} \boldsymbol{\Sigma}_1 & \mathbf{0} \\ \mathbf{0} & \boldsymbol{\Sigma}_2 \end{pmatrix}),$$

<sup>\*</sup>Corresponding author; Address: Bartholins Allé, DK-8000 Aarhus C – E-mail: stefanh@ph.au.dk

where  $\boldsymbol{\pi} = (\pi_1, \dots, \pi_k)^\top$ ,  $\mathbf{S} = (S_1(t_1), \dots, S_k(t_k))^\top$ . Here

$$\boldsymbol{\Sigma}_1 = \text{diag}(\boldsymbol{\pi}) - \boldsymbol{\pi}\boldsymbol{\pi}^\top, \quad \boldsymbol{\Sigma}_2 = \text{diag}(\sigma_1^2/\pi_1, \dots, \sigma_k^2/\pi_k),$$

for some  $\sigma_1^2, \dots, \sigma_k^2 > 0$ .

The delta method [1] on  $g(x_1, \dots, x_{2k}) = \sum_{i=1}^k x_i x_{k+i}$  now yields

$$\sqrt{n}(\widehat{S}_w(t_1) - S_w(t_1)) \xrightarrow{\mathcal{D}} \mathcal{N}_1(0, \sigma_w^2)$$

with

$$\sigma_w^2 = (\mathbf{S}^\top \quad \boldsymbol{\pi}^\top) \begin{pmatrix} \boldsymbol{\Sigma}_1 & \mathbf{0} \\ \mathbf{0} & \boldsymbol{\Sigma}_2 \end{pmatrix} \begin{pmatrix} \mathbf{S} \\ \boldsymbol{\pi} \end{pmatrix} = \mathbf{S}^\top \boldsymbol{\Sigma}_1 \mathbf{S} + \boldsymbol{\pi}^\top \boldsymbol{\Sigma}_2 \boldsymbol{\pi}.$$

The variance of this Kaplan–Meier estimator is thus approximately given by

$$\text{Var}(\widehat{S}_w(t_1)) \approx \frac{\sigma_w^2}{n} = \frac{1}{n} \left[ \sum_{i=1}^k \pi_i S_i(t_i)^2 - \left( \sum_{i=1}^k \pi_i S_i(t_i) \right)^2 + \sum_{i=1}^k \pi_i \sigma_i^2 \right].$$

If  $\widehat{\text{Var}}(\widehat{S}_i(t_i))$  is Greenwood's estimate of the variance  $\sigma_i^2/n_i$  of the Kaplan–Meier estimator in the  $i$ th group, then  $\sigma_i^2$  can be estimated by  $n_i \widehat{\text{Var}}(\widehat{S}_i(t_i))$ . Thus, we may estimate the variance by

$$\widehat{\text{Var}}(\widehat{S}_w(t_1)) = \frac{1}{n} \left[ \sum_{i=1}^k \frac{n_i}{n} \widehat{S}_i(t_i)^2 - \left( \sum_{i=1}^k \frac{n_i}{n} \widehat{S}_i(t_i) \right)^2 \right] + \sum_{i=1}^k \frac{n_i^2}{n^2} \widehat{\text{Var}}(\widehat{S}_i(t_i)).$$

## References

- [1] Lehmann, E.L.: Elements of Large-Sample Theory. Springer-Verlag, New York (1999)
- [2] van der Vaart, A.W.: Asymptotic Statistics. Cambridge University Press, Cambridge (2000)
